# Supplementary material
Source: PubMed Central journal article supplement (PMC5590822)
Supplement: NIHMS901901-supplement-1.pdf [file NIHMS901901-supplement-1.pdf]

Supplementary Information  
Supplementary Figures

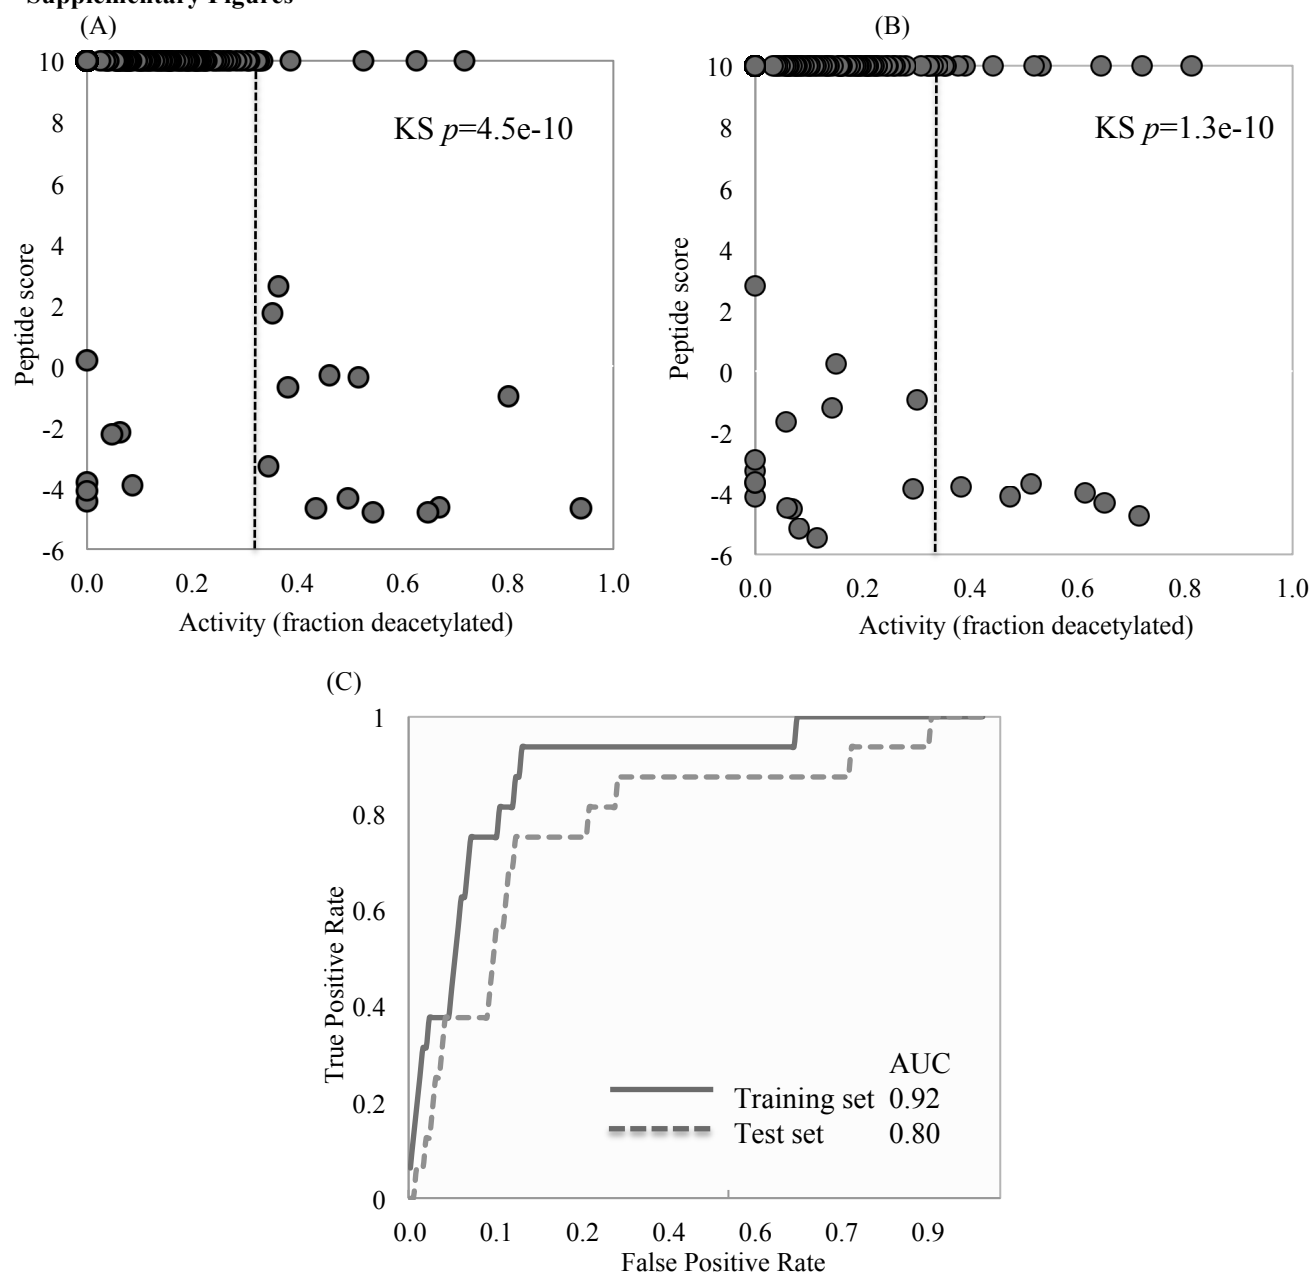

**Figure S1. Related to Figure 2A and Table S2:** Performance of the initial protocol on *Set\_GX1KacX2GC*. The set was separated into two parts to calibrate (A) and validate (B) the protocol (see Table S2). (A, B) Activity vs. peptide score plots. Activity is presented as the fraction of deacetylated substrate after 30 minutes. A 0.34 deacetylation threshold distinguishes optimally substrates from non-substrates (Kolmogorov-Smirnov  $p$ -values of  $4.5e-10$  and  $1.3e-05$ , respectively). (C) ROC plot for distinction of binders/non-binders according to the 0.34 deacetylation threshold (AUC values= $0.92$  and  $0.80$  for training [solid line] and test sets [dotted line], respectively).

1  
2  
3  
4  
5  
6  
7  
8  
9  
10  
11  
12  
13  
14  
15  
16  
17  
18  
19  
20  
21  
22  
23  
24  
25  
26  
27  
28  
29  
30  
31  
32  
33  
34  
35  
36  
37  
38  
39  
40  
41  
42  
43  
44  
45  
46  
47  
48  
49  
50  
51  
52  
53  
54  
55  
56  
57  
58  
59  
60  
61  
62  
63  
64  
65

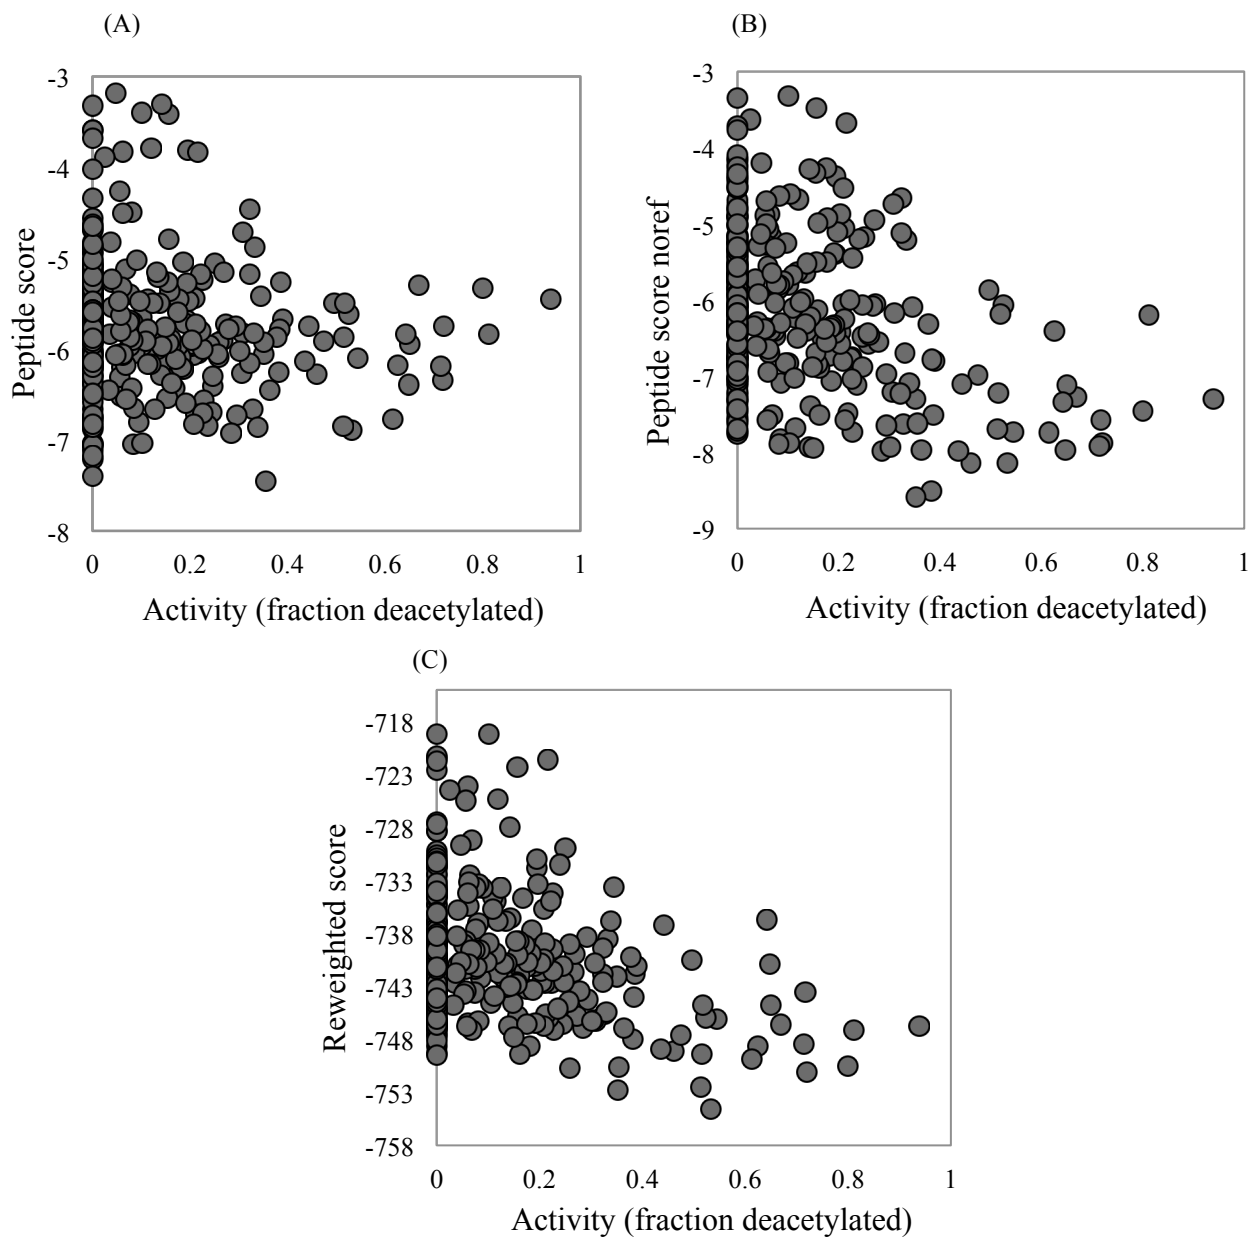

**Figure S2. Related to Figure 2A:** Performance of the optimized protocol (see Methods) on *Set\_GX<sub>1</sub>KacX<sub>2</sub>GC* using different scoring measures. Plots of predicted binding (y-axis) vs. experimental activity (x-axis) are shown for the measures *Peptide score* (A), *Peptide score no ref* (B), and *Reweighted score* (C).

## Supplementary Tables

**Table S1. Related to Figure 1:** Constraints used during structure optimization (derived from PDB id 2v5w)

| Comment                                                         | Type of constraint     | Constraint   | Atoms involved                                                   | Type of function               | # |
|-----------------------------------------------------------------|------------------------|--------------|------------------------------------------------------------------|--------------------------------|---|
| Enforce critical double hydrogen bond D101-Kac backbone         | atom pair <sup>a</sup> | 2.2 – 3.2Å   | D101 O <sup>δ2</sup> : Kac N                                     | BOUNDED <sup>b</sup>           | 1 |
|                                                                 | atom pair              | 2.5 - 3.5Å   | D101 O <sup>δ1</sup> : Coumarin N                                | BOUNDED                        | 2 |
|                                                                 | dihedral <sup>c</sup>  | 5.46 radians | Kac N : Kac C <sup>α</sup> : Kac C : Coumarine N                 | CIRCULAR HARMONIC <sup>d</sup> | 3 |
| Coordination of catalytic Zn ion                                | atom pair              | 2.8Å         | D267 O <sup>δ2</sup> / D267 O <sup>δ2</sup> : Kac O <sup>η</sup> | HARMONIC <sup>e</sup>          | 4 |
|                                                                 | atom pair              | 3.7Å         | D178 O <sup>δ2</sup> : Kac O <sup>η</sup>                        | HARMONIC                       | 5 |
|                                                                 | atom pair              | 3.3Å         | H180 N <sup>δ1</sup> : Kac O <sup>η</sup>                        | HARMONIC                       | 6 |
| Lock Kac side chain via stacking interactions and hydrogen bond | atom pair              | 3.0Å         | G151 O : Kac N <sup>ε</sup>                                      | HARMONIC                       | 7 |
|                                                                 | atom pair              | 3.8Å         | F152 C <sup>ε1</sup> / F152 C <sup>ε2</sup> : Kac C <sup>δ</sup> | HARMONIC                       | 8 |
|                                                                 | atom pair              | 3.7Å         | F208 C <sup>δ1</sup> / F208 C <sup>δ2</sup> : Kac C <sup>γ</sup> | HARMONIC                       | 9 |

<sup>a</sup> Distance constraint between two atoms

$$f(x) = \begin{cases} \left(\frac{x-lb}{sd}\right)^2 & \text{for } x < lb \\ 0 & \text{for } lb \leq x \leq ub \\ \left(\frac{x-ub}{sd}\right)^2 & \text{for } ub < x \leq ub + rswitch \cdot sd \\ \frac{1}{sd} (x - (ub + rswitch \cdot sd)) + \left(\frac{rswitch \cdot sd}{sd}\right)^2 & \text{for } x > ub + rswitch \cdot sd \end{cases}$$

<sup>b</sup> Bounded function: , where  $lb$ ,  $ub$  represent the lower and upper bounds, respectively, within which zero scoring penalty is applied;  $rswitch$  is set to 0.5

<sup>c</sup> Dihedral constraint between four atoms

$$f(x) = \left( \frac{NearestAngleRadians(x, x0) - x0}{sd} \right)^2$$

<sup>d</sup> Circular harmonic function: , where  $x0$  represents the radian in the starting structure.

$$f(x) = \left( \frac{x - x0}{sd} \right)^2$$

<sup>e</sup> Harmonic function:

A standard deviation of 0.2 was used in all constraint implementations.



|          |    |    |   |    |   |   |    |   |    |   |   |   |   |   |    |   |   |   |
|----------|----|----|---|----|---|---|----|---|----|---|---|---|---|---|----|---|---|---|
| <b>N</b> | 11 | 3  | 0 | 3  | 0 | 1 | 2  | 0 | 0  | 0 | 0 | 0 | 3 | 0 | 0  | 0 | 0 | 3 |
| <b>Q</b> | 0  | 3  | 0 | 2  | 0 | 1 | 0  | 3 | 3  | 2 | 0 | 0 | 0 | 0 | 3  | 0 | 0 | 3 |
| <b>K</b> | 11 | 3  | 0 | 0  | 0 | 0 | 3  | 0 | 0  | 0 | 1 | 0 | 0 | 0 | 0  | 0 | 0 | 0 |
| <b>R</b> | 11 | 3  | 0 | 2  | 3 | 3 | 21 | 3 | 11 | 3 | 0 | 0 | 0 | 3 | 3  | 0 | 3 | 4 |
| <b>H</b> | 2  | 12 | 3 | 11 | 0 | 0 | 2  | 3 | 3  | 2 | 0 | 0 | 0 | 0 | 4  | 3 | 0 | 0 |
| <b>D</b> | 3  | 11 | 3 | 0  | 0 | 0 | 0  | 0 | 3  | 0 | 0 | 0 | 0 | 0 | 11 | 0 | 0 | 0 |
| <b>E</b> | 0  | 0  | 3 | 3  | 0 | 1 | 0  | 0 | 0  | 0 | 0 | 0 | 0 | 0 | 3  | 0 | 0 | 0 |

**Table S4. Related to Table 2 and Figure 4C:** Determination of *Novel\_candidate\_set2* to define optimal scoring measure:  $I_{sc}$  vs. peptide\_sc\_noref

| Peptide                  | Protein ( Uniprot ID) | Min. $I_{sc}$ | Min. Pep_sc_noref | Binding strength <sup>a</sup> $I_{sc}/Pep\_sc\_noref$ | $k_{cat}/K_M$ |
|--------------------------|-----------------------|---------------|-------------------|-------------------------------------------------------|---------------|
| LS K <sub>747</sub> FLR  | CAD (P27708)          | -21.6         | -7.3              | ++/+                                                  | 630           |
| SF K <sub>55</sub> YAW   | EF1 alpha 1 (P68104)  | -20.8         | -10.2             | ++/++                                                 | 1176          |
| FG K <sub>1275</sub> FSW | Znf 318 (Q5VUA4)      | -20           | -9.5              | ++/++                                                 | 4826          |
| TW K <sub>78</sub> ANF   | IRF2 (P14316)         | -19.6         | -7.9              | ++/++                                                 | 77            |
| IS K <sub>504</sub> YDR  | Msh6 (P52701)         | -18.6         | -8.2              | ++/++                                                 | 83.5          |
| SL K <sub>269</sub> EFY  | ALDHIII (P30838)      | -18           | -7.9              | ++/++                                                 | 78            |
| RL K <sub>713</sub> YSQ  | SMC1A (Q14683)        | -16.8         | -7.2              | +/+                                                   | 79.5          |
| SG K <sub>149</sub> YYY  | CBX4 (O00257)         | -16.8         | -9.8              | +/+                                                   | 21            |
| LG K <sub>1017</sub> FRR | LARP1 (Q6PKG0)        | -19.1         | -6.1              | ++/-                                                  | 349           |
| KI K <sub>31</sub> RLR   | 60S L7 (P18124)       | -18.5         | -5.1              | ++/--                                                 | 38            |
| SG K <sub>516</sub> YFA  | AMPD2 (Q01433)        | -16.2         | -9.2              | -/++                                                  | 20            |
| FV K <sub>358</sub> AFA  | ALDH5A1 (P51649)      | -14.7         | -8.9              | --/++                                                 | 3             |
| TF K <sub>8</sub> GVD    | HN1 (Q9UK76)          | -15.4         | -8.2              | --/++                                                 | 14            |
| GG K <sub>11</sub> AFG   | AIF1 (P55008)         | -14.5         | -7.4              | --/+                                                  | 21            |
| GI K <sub>371</sub> PFL  | anillin (Q9NQW6)      | -7            | -7.1              | --/+                                                  | 0             |
| SQ K <sub>359</sub> EED  | SMARCC1 (Q92922)      | -14.6         | -6.3              | --/-                                                  | NA            |
| KG K <sub>878</sub> DAE  | N-CoR2 (Q9Y618)       | -14.5         | -5                | --/--                                                 | 36            |
| RK K <sub>292</sub> GEP  | p53 (P04637)          | -11.9         | -4.9              | --/--                                                 | 10            |
| SE K <sub>1970</sub> PEK | DNA-PKcs (P78527)     | -8            | -2.8              | --/--                                                 | 5             |

<sup>a</sup> Strength measure: ++ = very strong binder ( $I_{sc} \leq -18.0$ ;  $Pep\_sc\_noref \leq -7.5$ ); + = moderate binder ( $I_{sc} \leq -16.5$ ;  $Pep\_sc\_noref \leq -7.0$ ); - = poor substrate ( $I_{sc} > -16.5$ ;  $Pep\_sc\_noref > -7.0$ ); -- = very poor substrate ( $I_{sc} > -16.0$ ;  $Pep\_sc\_noref > -6.0$ )

**Table S5. Related to Tables 1-3:** Local structure of the substrate peptide within the context of the full protein (predicted, or derived from structure if crystallographic coordinates are available). For proteins without solved structures, probability for disorder was calculated using IUPred (Dosztanyi et al., 2005) and secondary structure was predicted using PSIPred (Jones, 1999).

*Novel\_candidate\_set1*

| Peptide                 | Protein (Uniprot ID)  | Disorder (IUPred <sup>a</sup> ) | Pdb Id-Chain | Secondary structure (PSIPred <sup>b</sup> ) |
|-------------------------|-----------------------|---------------------------------|--------------|---------------------------------------------|
| VS K <sub>350</sub> GPF | KAT6A (Q92794)        | 0.7                             | -            | CCCCC-CCCCC-CCCCC                           |
| SF K <sub>769</sub> SDQ | TRIM33 (Q9UPN9)       | 0.5                             | -            | CCCCC-EECCCC-CEECC                          |
| VS K <sub>93</sub> GTL  | Histone H1.5 (P16401) | 0.2                             | -            | HHHHH-HHCCCE-CEEEC                          |
| DI K <sub>42</sub> YPL  | B5R (P00387)          | Exposed in loop                 | 1umk-A       | TTTTT-TTCEEE-EEEEE                          |
| DH K <sub>604</sub> TLY | KAT6A (Q92794)        | Loop region; points inwards     | 2rc4-A       | HHHCT-TTCTT-TTTTT                           |

1  
2  
3  
4  
5  
6  
7  
8  
9  
10  
11  
12  
13  
14  
15  
16  
17  
18  
19  
20  
21  
22  
23  
24  
25  
26  
27  
28  
29  
30  
31  
32  
33  
34  
35  
36  
37  
38  
39  
40  
41  
42  
43  
44  
45  
46  
47  
48  
49  
50  
51  
52  
53  
54  
55  
56  
57  
58  
59  
60  
61  
62  
63  
64  
65

|                      |     |                            |                                        |        |                     |
|----------------------|-----|----------------------------|----------------------------------------|--------|---------------------|
| SG K <sub>256</sub>  | YDL | Alpha-enolase (P06733)     | Exposed in loop                        | 3b97-C | GGCEE-TTEETT-TTTTC  |
| DS K <sub>1583</sub> | NAK | CBP (Q92793)               | 0.7                                    | -      | CCCCC-CCCCC-CCCCC   |
| KP K <sub>209</sub>  | AAK | Histone H1.5 (P16401)      | 0.8                                    | -      | CCCCC-CCCCC-CCCCC   |
| PG K <sub>117</sub>  | GVK | E2F1 (Q01094)              | 0.8                                    | -      | CCCCC-CCCCC-CCCCC   |
| FT K <sub>252</sub>  | DHL | TRIM33 (Q9UPN9)            | 0.3                                    | -      | HCCCC-CCCCCE-CEEEE  |
| KG K <sub>953</sub>  | TAQ | TRIM33 (Q9UPN9)            | Missing coordinates - high flexibility | 3u5o-C | TTTTT-TTCTTT-TCCHH* |
| KK K <sub>1588</sub> | NNK | CBP (Q92793)               | 0.8                                    | -      | CCCCC-CCCCC-CCCCC   |
| II K <sub>593</sub>  | DGE | AIFM1 (O95831)             | Exposed at end of helix                | 4lii-A | HHHHH-HHHHCC-BTTTH  |
| TQ K <sub>755</sub>  | QEQ | Nucleoprotein TPR (P12270) | 0.5                                    | -      | HHHHH-HHHHHH-HHHHH  |
| GV K <sub>168</sub>  | KVA | Histone H1.5 (P16401)      | 0.7                                    | -      | CCCCC-CCCCC-CCCCC   |
| DD K <sub>169</sub>  | YTL | SPC25 (Q15005)             | 0.1                                    | -      | CCCCC-CEEEEE-EEEEE  |
| SG K <sub>345</sub>  | KGQ | SMARCC1 (Q92922)           | 0.8                                    | -      | CCCCC-CCCCC-CCCCC   |
| SF K <sub>109</sub>  | LNK | Histone H1.5 (P16401)      | 0.5                                    | -      | CCCCE-EEEECC-CCCCC  |
| NQ K <sub>748</sub>  | LTA | Nucleoprotein TPR (P12270) | 0.5                                    | -      | HHHHH-HHHHHH-HHHHH  |
| VG K <sub>815</sub>  | SVS | KAT6A (Q92794)             | 0.7                                    | -      | CCCCC-CCCCC-CCCCC   |

<sup>a</sup> Disorder prediction using IUPRED (Dosztanyi et al., 2005): disordered ( $p \geq 0.5$ ), structured ( $p < 0.5$ )

<sup>b</sup> Secondary structure: previous 5 residues-peptide fragment- following 5 residues. Based on solved structure, or secondary structure prediction using PSIPRED (Jones, 1999)

\* Missing coordinates within solved structure

#### Novel candidate set2

| Peptides             | Protein (Uniprot ID) | Disorder (IUPred)    | Pdb Id-Chain                                                  | Secondary structure (PSIPred) |                    |
|----------------------|----------------------|----------------------|---------------------------------------------------------------|-------------------------------|--------------------|
| FG K <sub>1275</sub> | FSW                  | Znf 318 (Q5VUA4)     | 0.5                                                           | -                             | CCCCC-CCCCC-CCCCC  |
| SF K <sub>55</sub>   | YAW                  | EF1 alpha 1 (P68104) | 0.1                                                           | -                             | HCCCC-CEEHHH-HHHHH |
| LS K <sub>747</sub>  | FLR                  | CAD (P27708)         | 0.1                                                           | -                             | ECCCC-HHHHCC-CCCCC |
| LG K <sub>1017</sub> | FRR                  | LARP1 (Q6PKG0)       | Exposed near end of flexible helix                            | 4zc4-A                        | HHHHH-HHHHCC-CCCCH |
| IS K <sub>504</sub>  | YDR                  | Msh6 (P52701)        | Exposed at end of short helix; Close to protein-DNA interface | 2o8f-B                        | HHTTT-TCGGGC-CCCEE |
| RL K <sub>713</sub>  | YSQ                  | SMC1A (Q14683)       | 0.5                                                           | -                             | HHHHH-HHHHHH-HHHHH |
| TW K <sub>78</sub>   | ANF                  | IRF2 (P14316)        | 0.5                                                           | -                             | CCCHH-HHHHHH-HHHHH |
| SL K <sub>269</sub>  | EFY                  | ALDHIII (P30838)     | Exposed near end of helix                                     | 4l2o-G                        | HHHHH-HHHHHH-TTTGG |
| KI K <sub>31</sub>   | RLR                  | 60S L7 (P18124)      | 0.4                                                           | -                             | HHHHH-HHHHHH-HHHHH |
| KG K <sub>878</sub>  | DAE                  | N-CoR2 (Q9Y618)      | 0.7                                                           | -                             | CCCCC-CCCCC-CCCCC  |
| SG K <sub>149</sub>  | YYY                  | CBX4 (O00257)        | 0.7                                                           | -                             | CCCCC-CCCCCE-CEECC |
| GG K <sub>11</sub>   | AFG                  | AIF1 (P55008)        | Flexible region in NMR model                                  | 2g2b-A                        | TTTCC-CCCCGG-GHHHH |
| SG K <sub>516</sub>  | YFA                  | AMPD2 (Q01433)       | 0.1                                                           | -                             | CCCCC-CHHHHH-HHHHH |
| TF K <sub>8</sub>    | GVD                  | HN1 (Q9UK76)         | 0.8                                                           | -                             | CEEEE-ECCCCC-CCCCC |
| RK K <sub>292</sub>  | GEP                  | p53 (P04637)         | 0.7                                                           | -                             | HHHHC-CCCCC-CCCCC  |
| SE K <sub>1970</sub> | PEK                  | DNA-PKcs (P78527)    | 0.0                                                           | -                             | EEEEE-CCCCC-CCCEE  |
| FV K <sub>358</sub>  | AFA                  | ALDH5A1 (P51649)     | Exposed in middle of helix                                    | 2w8r-A                        | GGHHH-HHHHHH-HHHHH |
| GI K <sub>371</sub>  | PFL                  | anillin (Q9NQW6)     | 0.7                                                           | -                             | CCCCC-CCCCC-CCCCC  |

### Proteometargets\_set3

| Peptides <sup>a</sup>                     | Protein ( Uniprot ID) | Disorder (IUPred) | Secondary structure (PSIPred*) |
|-------------------------------------------|-----------------------|-------------------|--------------------------------|
| KLIS <b>K</b> <sub>1808</sub> <b>FDKL</b> | ARID1A (O14497)       | 0.4               | CCCCC-CCCCC-CCEEE              |
| STPV <b>K</b> <sub>292</sub> <b>FISR</b>  | CSRP2BP (Q9H8E8)      | 0.5               | CCCCC-CCCCC-CCCC               |
| RVIGAK <b>K</b> <sub>106</sub> <b>DQY</b> | SMC3 (Q9UQE7)         | 0.1               | EEEEEE-CCCEEE-EECCE            |
| KRILH <b>K</b> <sub>687</sub> <b>LLQN</b> | NCOA3 (Q9Y6Q9)        | 0.5               | HHHHH-HHHHHC-CCCC              |
| SKIQ <b>K</b> <sub>3579</sub> <b>QLDQ</b> | MLL2 (O14686)         | 0.6               | HHHHH-HHHHHH-HHHHH             |
| KLGG <b>K</b> <sub>1087</sub> <b>QRAA</b> | RAI1 (Q7Z5J4)         | 0.9               | CHHHC-CCCCC-CCCC               |
| KLSG <b>K</b> <sub>167</sub> <b>EING</b>  | SRSF5 (Q13243)        | 0.5               | HHHHH-CCCCC-CEEEE              |
| LGDG <b>K</b> <sub>387</sub> <b>MKS</b>   | THRAP3 (Q9Y2W1)       | 0.6               | CCCCC-CCCCC-CCCC               |
| TEIG <b>K</b> <sub>54</sub> <b>TLAEK</b>  | ZRANB2 (O95218)       | 0.5               | CCCCC-HHHHHC-CCCC              |

<sup>a</sup>hexamer stretch of interest is shown in bold

\* no solved structures were available for any of these targets in the regions of interest

## Supplemental Experimental Procedures

- **Rosetta Run-line commands. Related to Methods:** In all runs, we used Rosetta version 3.4., with minor changes. All files are included as Appendix).

1. Thread peptide sequences onto template, using the *Rosetta fixbb* protocol:

```
$ROSETTA_BIN/fixbb.linuxgccrelease -database $ROSETTA_DB -s template.pdb -resfile  
threading_resfile -ex1 -ex2aro -use_input_sc -nstruct 1 >design.log
```

where the Rosetta executable (*\$ROSETTA\_BIN/fixbb.linuxgccrelease*) and the Rosetta database (*\$ROSETTA\_DB*) paths are provided. The input is provided using the *'-s template.pdb'* flag; threading instructions are defined in the resfile and provided using the *'-resfile threading\_resfile'* flag. Increased rotamer sampling is enforced for  $\chi_1$  and aromatic  $\chi_2$  angles, using the *'-ex1 -ex2aro'* flags. One output structure is generated as instructed by the *'-nstruct 1'* flag. The output is written to the log file *design.log*.

Given below is an example resfile to thread hexamer GYKFGC onto the chain B residues numbered 364 - 369.

```
NATRO  
start  
364 B PIKAA G EX 1 EX 2 USE_INPUT_SC  
365 B PIKAA Y EX 1 EX 2 USE_INPUT_SC  
366 B PIKAA K EX 1 EX 2 USE_INPUT_SC  
367 B PIKAA F EX 1 EX 2 USE_INPUT_SC  
368 B PIKAA G EX 1 EX 2 USE_INPUT_SC  
369 B PIKAA C EX 1 EX 2 USE_INPUT_SC
```

2. Optimize receptor structure before peptide docking: prepack threaded template using Rosetta FlexPepDock:

```
$ROSETTA_BIN/FlexPepDocking.linuxgccrelease -database $ROSETTA_DB -s  
threaded_template.pdb -ex1 -ex2aro -use_input_sc -unboundrot unbound.pdb -  
flexpep_prepack -nstruct 1
```

The flag *'-flexpep\_prepack'* performs prepacking on the input provided using the *'-s threaded\_template.pdb'* flag and generates one prepacked output as instructed by *'-nstruct 1'* flag. Input side-chain and unbound receptor side-chain coordinates are included in the rotamer library using the *'-use\_input\_sc'* and *'-unboundrot'* flags, respectively.

3. Minimize structure using Rosetta FlexPepDock:

```
$ROSETTA_BIN/FlexPepDocking.linuxgccrelease -database $ROSETTA_DB -s  
threaded_template_prepacked.pdb -flexPepDockingMinimizeOnly -cst_fa_file cons.cst  
-cst_fa_weight 1.0 -nstruct 1
```

1  
2  
3  
4 Minimization of the prepacked input threaded\_template\_prepacked.pdb is performed using the '-  
5 flexPepDockingMinimizeOnly' flag. The constraint file and corresponding weight addition to the scoring function are  
6 provided by '-cst\_fa\_file' and 'cst\_fa\_weight' flags, respectively.  
7

#### 8 4. Refine structure using Rosetta FlexPepDock:

9 \$ROSETTA\_BIN/FlexPepDocking.linuxgccrelease -database \$ROSETTA\_DB -s  
10 threaded\_template\_prepacked.pdb -ex1 -ex2aro -use\_input\_sc -unboundrot unbound.pdb  
11 -pep\_refine -cst\_fa\_file cons.cst -cst\_fa\_weight 1.0 -nstruct 200  
12 Refinement of the prepacked input threaded\_template\_prepacked.pdb is performed (200 models are generated) using the '-  
13 pep\_refine' flag. The constraint file and corresponding weight addition to the scoring function is provided by '-cst\_fa\_file'  
14 and 'cst\_fa\_weight' flags, respectively.  
15

16 Given below is the constraint file used to keep critical interactions during the simulation (each constraint is numbered as in  
17 **Table S1**)

```
18 AtomPair OD1 101 N 367 BOUNDED 2.5 3.5 0.2 0.5 TAG #1  
19 AtomPair OD2 101 N 366 BOUNDED 2.2 3.2 0.2 0.5 TAG #2  
20 Dihedral N 366 CA 366 C 366 N 367 CIRCULARHARMONIC 5.463 0.2 #3  
21 AmbiguousConstraint  
22 AtomPair OD2 267 OH 366 HARMONIC 2.9 0.2 #4  
23 AtomPair OD1 267 OH 366 HARMONIC 2.9 0.2  
24 END_AMBIGUOUS  
25 AmbiguousConstraint  
26 AtomPair OD2 164 OH 366 HARMONIC 3.7 0.2 #5  
27 AtomPair OD1 164 OH 366 HARMONIC 3.7 0.2  
28 END_AMBIGUOUS  
29  
30 AtomPair ND1 166 OH 366 HARMONIC 3.3 0.2 #6  
31 AtomPair O 137 NZ 366 HARMONIC 3.0 0.2 #7  
32 AmbiguousConstraint  
33 AtomPair CE1 138 CD 366 HARMONIC 3.8 0.2 #8  
34 AtomPair CE2 138 CD 366 HARMONIC 3.8 0.2  
35 END_AMBIGUOUS  
36 AmbiguousConstraint  
37 AtomPair CD1 194 CG 366 HARMONIC 3.7 0.2 #9  
38 AtomPair CD2 194 CG 366 HARMONIC 3.7 0.2  
39 END_AMBIGUOUS  
40  
41
```

42 **HDAC8 expression and assay.** Recombinant HDAC8 was expressed, purified and reconstituted with stoichiometric zinc, as  
43 previously described (Wolfson et al., 2014). Peptides were purchased from Sigma-Aldrich with acetylated N-termini as  
44 unpurified peptides and were solubilized in 50% acetonitrile or water and treated with Chelex resin before use.  
45 *Novel\_candidate\_set1* peptides contain a C-terminal carboxylate while *Novel\_candidate\_set2* peptides contain a C-terminal  
46 carboxamide. The initial rate for deacetylation of peptides (two concentrations  $\geq 100$   $\mu$ M) catalyzed by 1  $\mu$ M HDAC8 was  
47 determined by enzymatically coupling the formation of acetate to the production of NADH in a stopped assay format and  
48 quantified by fluorescence (ex. = 340 nm, em. = 460 nm). The values of  $k_{cat}/K_M$  were calculated from fitting a line to the  
49 substrate-dependence of the initial rate.  
50

51 **Prediction of local structural features. Related to Table S5.** In order to assess the ability of the identified substrates to  
52 undergo deacetylation by HDAC8 within the context of the full protein, we further investigated the accessibility of the target  
53 lysine by HDAC8: (1) *Local accessibility*: For proteins with solved structures, we calculated the accessibility of the target  
54 lysine. For the rest, we calculated the *probability for being intrinsically disordered* (using *IUPred* (Dosztanyi et al., 2005)):  
55 such regions within a protein are generally accessible. (2) *Local secondary structure* can play an important role in the ability of  
56 the substrate peptide to bind to HDAC8 in a catalysis-competent conformation. In particular, the *cis* peptide backbone  
57 geometry necessary to allow hydrogen bonding of the acetylated lysine residue of the substrate to HDAC8 residue D101 (see  
58 **Figure 1**) indicates that a helical peptide might not be a good candidate for deacetylation. The secondary structure was  
59 extracted from the solved structure, or predicted using *PSIPred* secondary structure prediction (Jones, 1999).  
60  
61  
62  
63  
64  
65



1  
2  
3  
4  
5  
6  
7  
8  
9  
10  
11  
12  
13  
14  
15  
16  
17  
18  
19  
20  
21  
22  
23  
24  
25  
26  
27  
28  
29  
30  
31  
32  
33  
34  
35  
36  
37  
38  
39  
40  
41  
42  
43  
44  
45  
46  
47  
48  
49  
50  
51  
52  
53  
54  
55  
56  
57  
58  
59  
60  
61  
62  
63  
64  
65

**References**

DOSZTANYI, Z., CSIZMOK, V., TOMPA, P. & SIMON, I. 2005. The pairwise energy content estimated from amino acid composition discriminates between folded and intrinsically unstructured proteins. *J Mol Biol*, 347, 827-39.

JONES, D. T. 1999. Protein secondary structure prediction based on position-specific scoring matrices. *J Mol Biol*, 292, 195-202.
